# Supplementary material
Source: PubMed Central journal article supplement (PMC6252260)

### **Supplemental Figure Legends**

**Figure S1. Time Course of CD4<sup>+</sup> T cell expansion in response to intradermal immunization with dmLT or CpG.** C57BL/6 mice were immunized with 2W1S-GFP protein plus either CpG or dmLT in the pinna of each ear. At each indicated time point, the mice were assayed the number indicated cells in CLN and spleen: A) Total 2W1S-specific CD4<sup>+</sup> cells. B) Total  $\alpha 4\beta 7^+$  2W1S-specific T cells. Each time point represents three mice and is representative of two independent experiments.

**Figure S2. Quantification of total numbers of antigen-specific CD4<sup>+</sup> T cells in different tissues of dmLT and CpG immunized mice.** Mice immunized with CpG or dmLT plus 2W1S-GFP were assayed nine days later for 2W1S-specific CD4<sup>+</sup> T cell responses which were then quantified. A) Total number of 2W1S-specific CD4 T cells in the CLN, MLN, and spleen, B) total number of  $\alpha 4\beta 7^+$ , 2W1S-specific CD4 T cells in the CLN, MLN, and spleen, C) Total number of 2W1S-specific CD4 T cells in the small and large intestine. Five mice per group representative of two independent experiments. Significance was determined by student's two-tailed t-test. Statistical significance is shown on each graph. Error bars represent SEM.

**Figure S3. Antigen-specific CD4<sup>+</sup> T cell lung migration was comparable between dmLT and CpG immunized mice.** Mice immunized with CpG or dmLT plus 2W1S-GFP were assayed nine days later for lung 2W1S-specific CD4<sup>+</sup> T cell responses. Tetramer<sup>+</sup> cells were magnetically enriched before analysis. A) representative flow cytometry plots and B) quantification of T cell numbers are shown. Representative of two independent experiments with [two](#) to four mice per group.

Significance was determined by student's two-tailed t-test. Statistical significance is defined as follows: \*,  $P < 0.05$ ; \*\*,  $P < 0.01$ ; \*\*\*,  $P < 0.005$ . Error bars represent SEM.

**Figure S4. dmLT induces greater expression of  $\alpha 4\beta 7$  and MLN migration compared to Pam3CSK(4).** C57BL/6 mice were intradermally immunized with 2W1S-GFP plus either Pam3CSK(4) or dmLT. Nine days post immunization, CLN, MLN, and spleen were harvested and dissociated to yield lymphocytes. Single-cell suspensions were then magnetically enriched for 2W1S-specific  $CD4^+$  T cells. A) Representative plots on the left demonstrate the enriched 2W1S-specific fraction of  $CD4^+$  T cells. B) To the right are the representative plots showing  $\alpha 4\beta 7$  expression on 2W1S-specific  $CD4^+$  T cells. The bottom figure is the graphical representation of % $\alpha 4\beta 7^+$  2W1S-specific cells. From one independent experiment of two experiments with three mice per group. Significance was determined by Student's two-tailed test with Holm-Sidak correction for multiple comparisons where \*= $p < 0.05$ ; \*\*= $p < 0.01$ ; \*\*\*= $p < 0.001$ .

**Figure S5. Modifying Route of dmLT Administration Does Not Impact  $\alpha 4\beta 7$  Imprinting on 2W1S-specific T cells.** C57BL/6 mice were immunized with 2W1S-GFP plus dmLT intradermally in each ear pinna, the flank near the hind leg, or intramuscularly in the hind leg. At nine days post immunization, the draining CLN and MLN were harvested and dissociated to yield lymphocytes. Single-cell suspensions were then magnetically enriched for 2W1S-specific  $CD4^+$  T cells. A) Representative plots showing comparison of intradermal ear pinna versus flank injections and B) representative plots showing the comparison between intradermal and intramuscular immunizations. From two independent experiments with two to three mice per group.

**Figure S6. dmLT induces IL-17 and IFN- $\gamma$  following in vivo restimulation with 2W1S peptide in 2W1S-specific CD4<sup>+</sup> T cells.** C57BL/6 mice were immunized with CpG or dmLT plus 2W1S-GFP and then immunized mice were intravenously pulsed with 100  $\mu$ g of purified 2W1S peptide nine days after prime. Two hours after peptide stimulation, mice were sacrificed and spleens harvested. Tissues were directly homogenized in media containing Brefeldin A. 2W1S-specific cells were labeled with 2W1S:MHCII and magnetically enriched. Enriched cells were then fixed, permeabilized and stained for cytokines. A) Representative FACS plots of splenic 2W1S-specific CD4<sup>+</sup> T cell IL-17A and IFN- $\gamma$  cytokine staining, B) Graphs of cytokine production for two independent experiments pooled are shown with three mice per group. Significance was determined by Student's two-tailed t test where \*=p<0.05; \*\*=p<0.01; \*\*\*=p<0.001.

**Figure S7. Batf3<sup>-/-</sup> mice lack CD103 dDCs.** Batf3<sup>-/-</sup> mice and WT mice were intradermally immunized with dmLT. One day after immunization, CLN were harvested and stained for the presence of CD11c<sup>+</sup> CD103<sup>+</sup> DCs and the absence of CD103<sup>+</sup> was confirmed by FACS analysis. Gated events represent CD19<sup>-</sup> MHCII<sup>+</sup> bulk DCs. Representative of three mice.

# Figure S1

## A

Ag-specific CD4+ Kinetics of CpG vs. dmLT

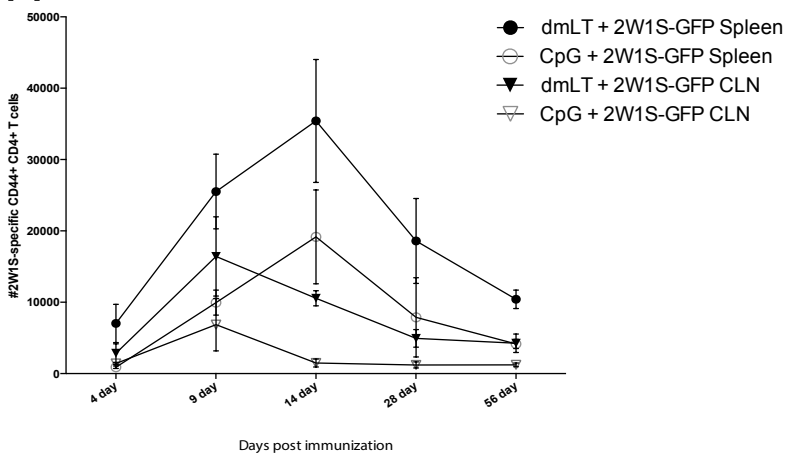

## B

Ag-specific CD4+ Kinetics of CpG vs. dmLT

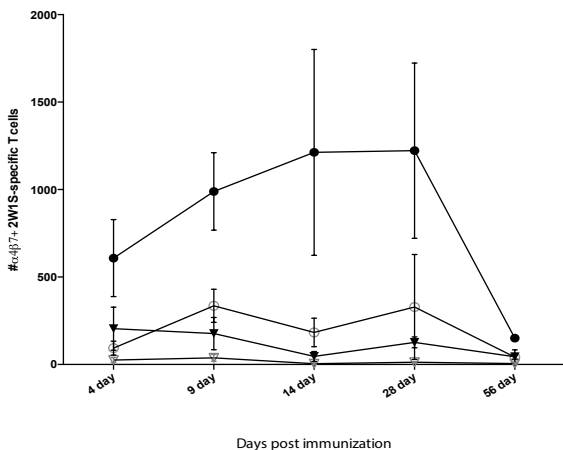

Figure S2

A

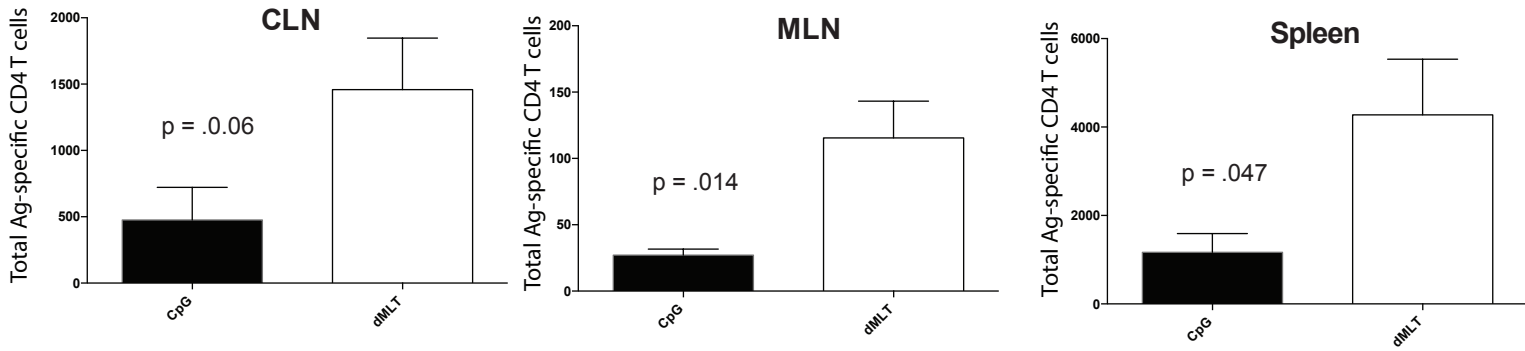

B

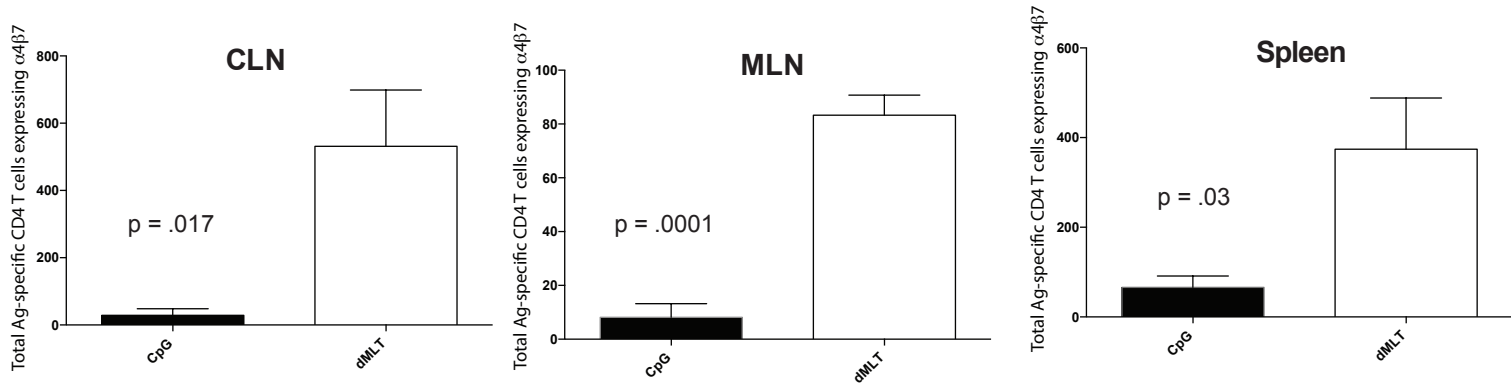

C

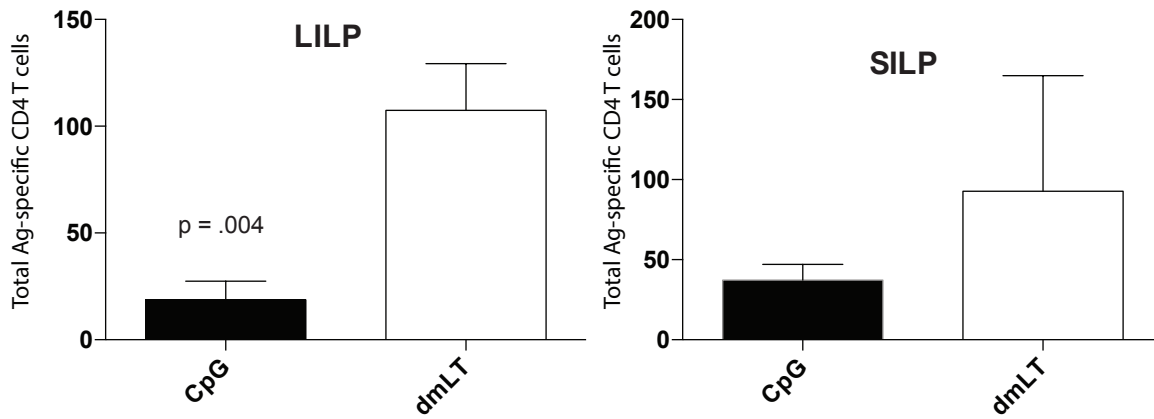

Figure S3

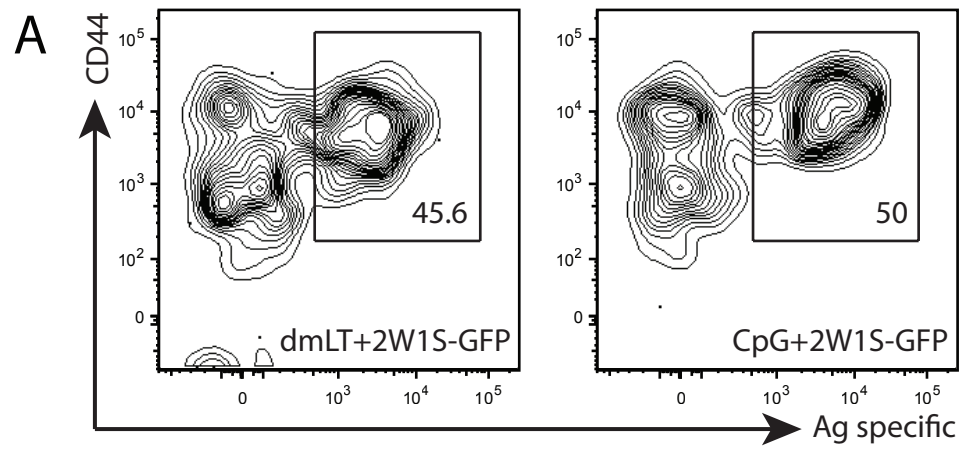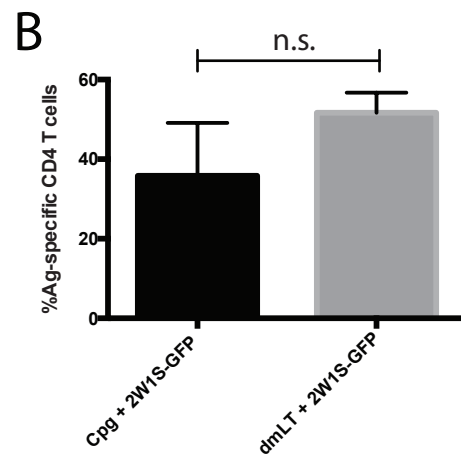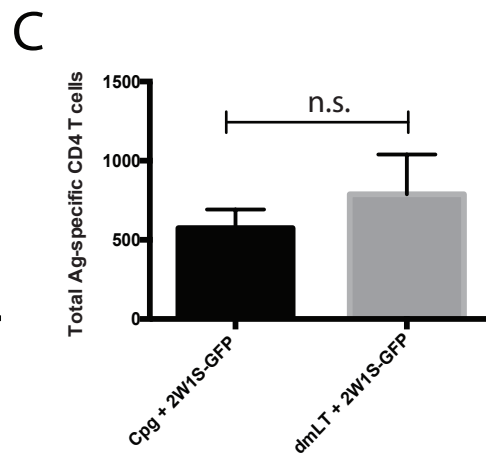

Figure S4

A

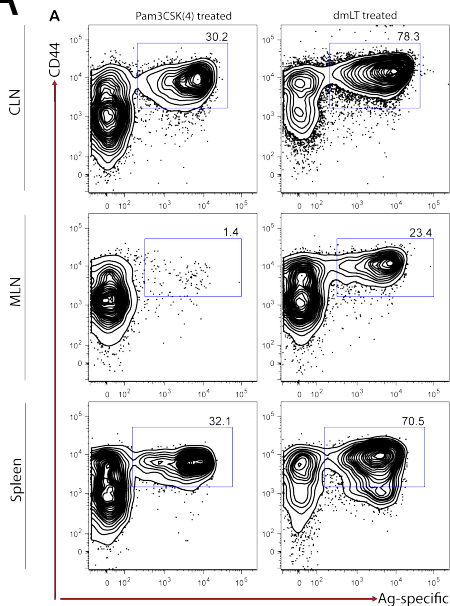

B

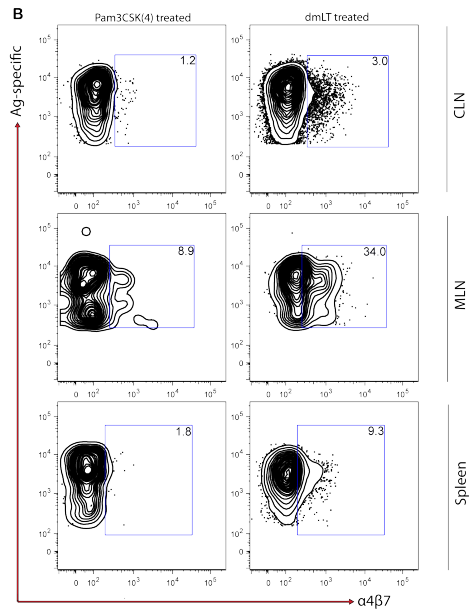

B

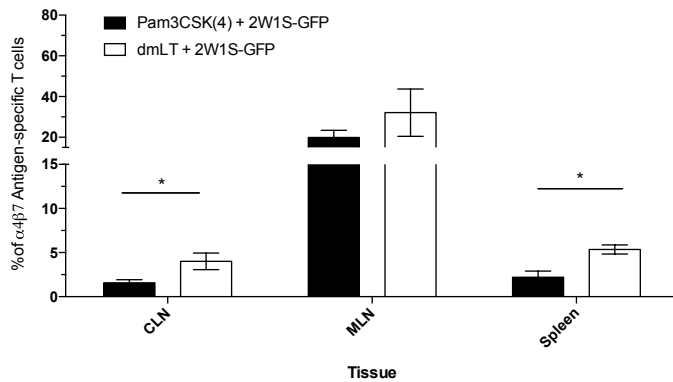

Figure S5

A

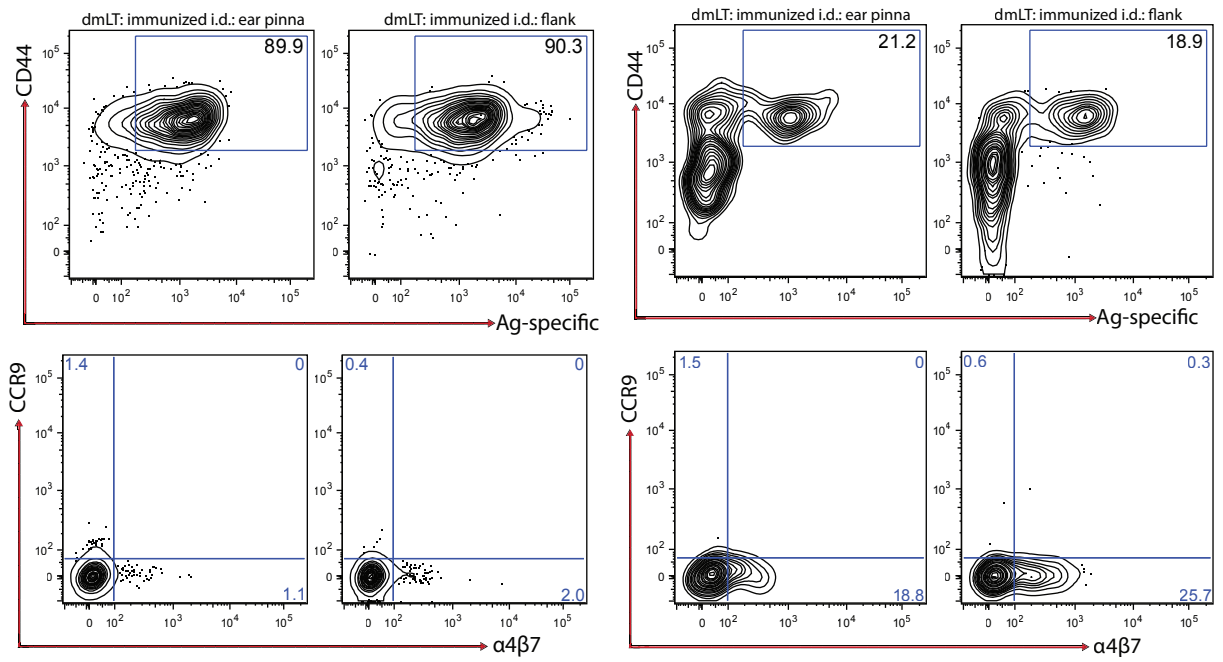

B

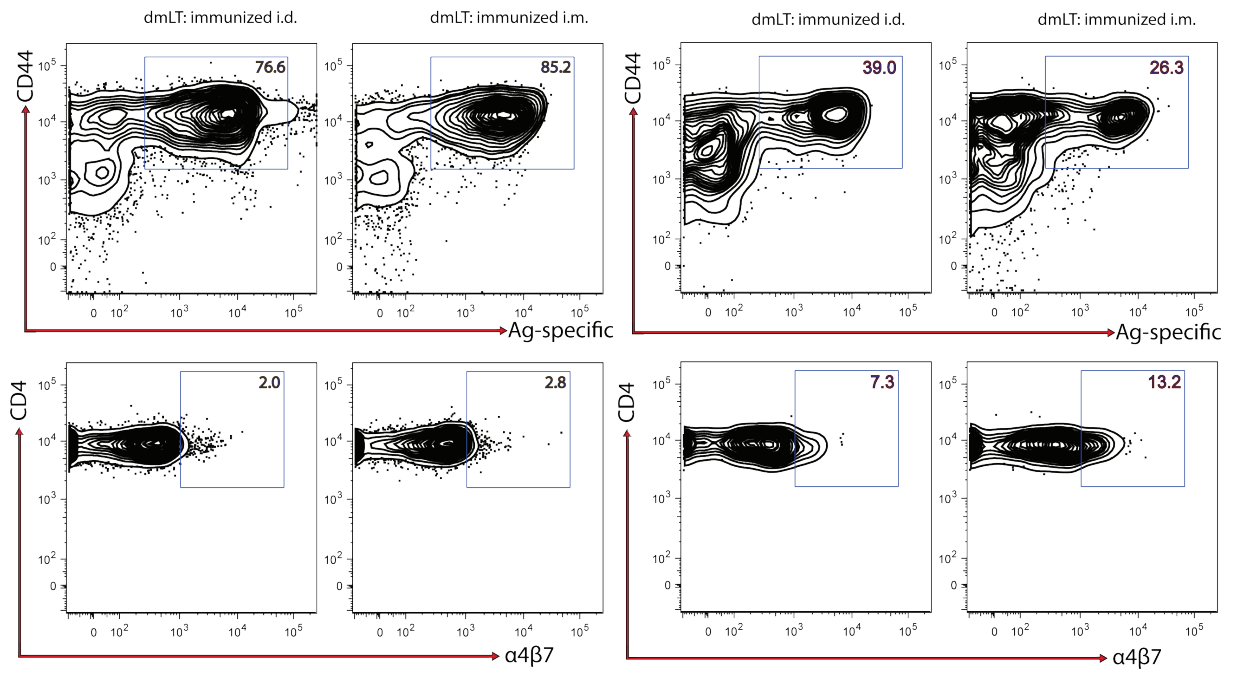

Figure S6

A

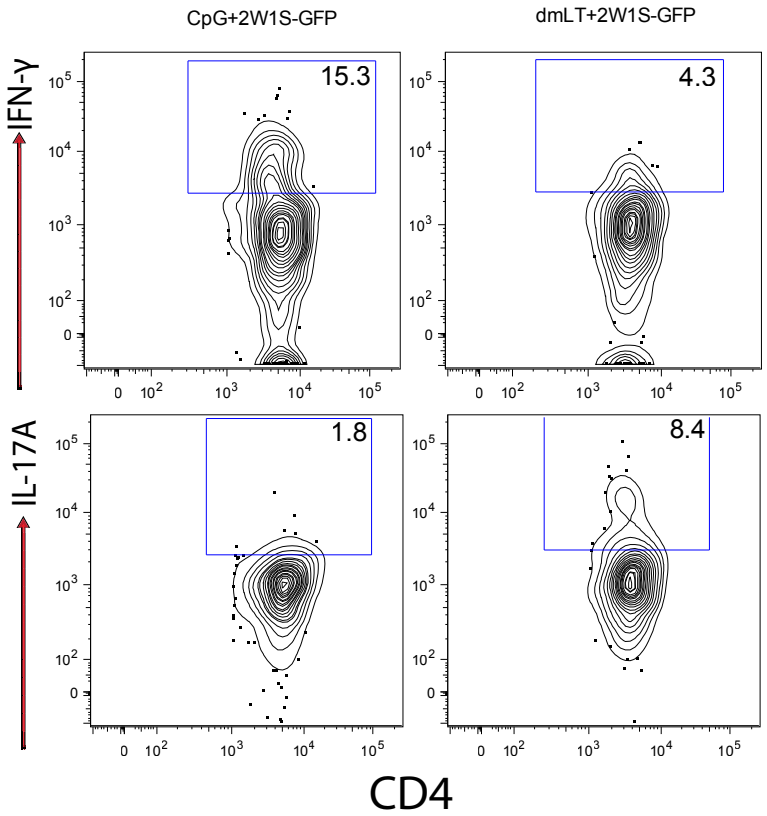

B

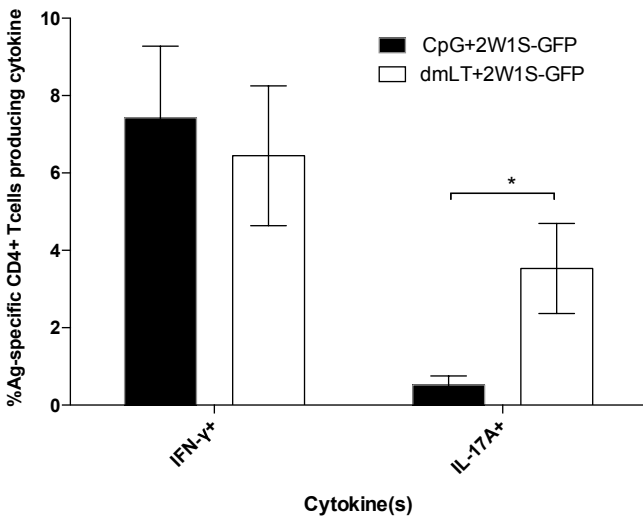

Figure S7

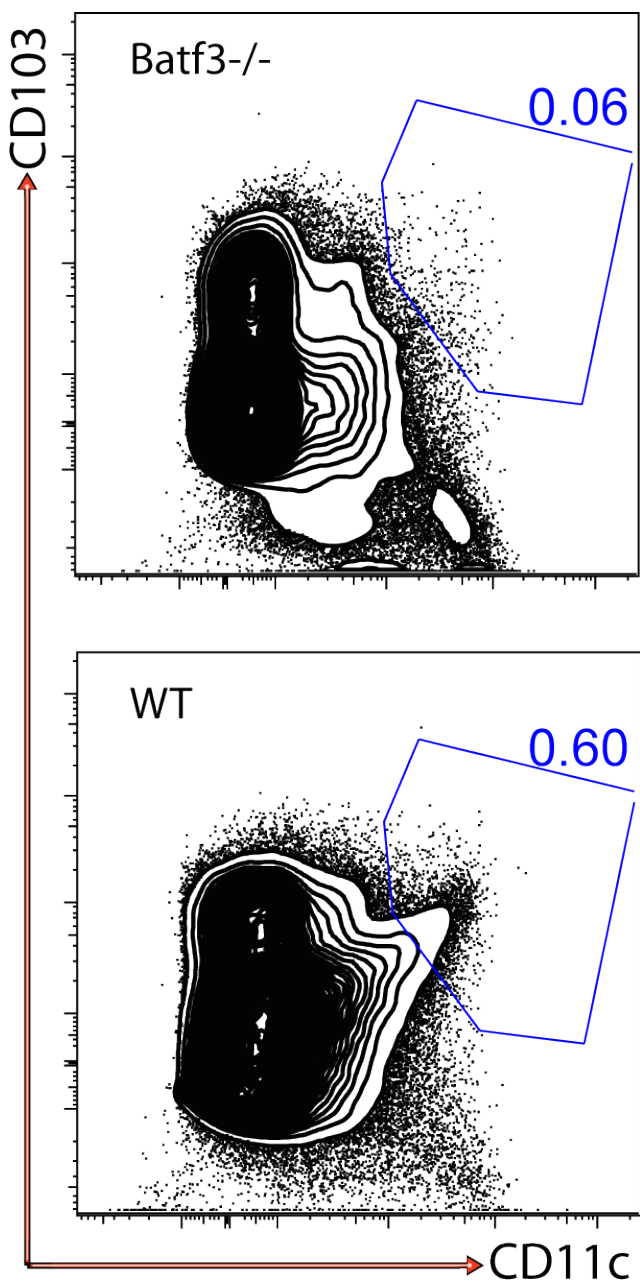

Supplement: NIHMS889915-supplement-Supp_Figs_S1_to_s7.pdf [file NIHMS889915-supplement-Supp_Figs_S1_to_s7.pdf]
